# Supplementary material
Source: Springer Nature journal article supplement (https://www.springermedizin.de/resource/supplementary/12984_2011_425_MOESM8_ESM.pdf/9605974)

a) Flexion, 50% MVC

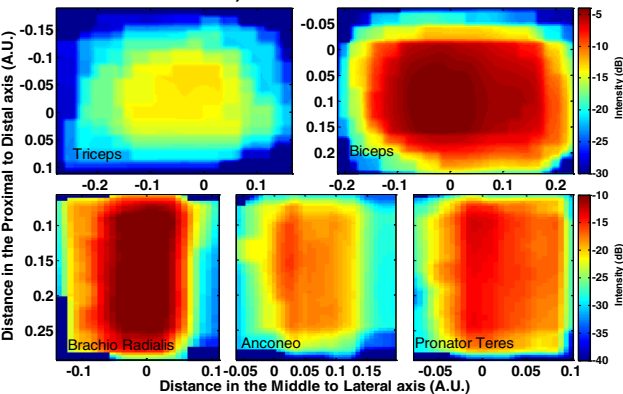

b) Extension, 50% MVC

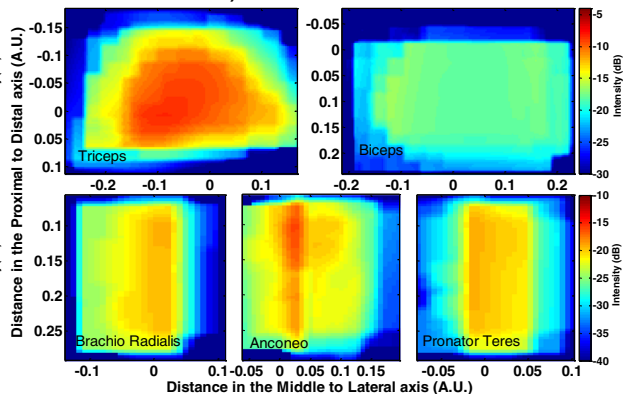

c) Supination, 50% MVC

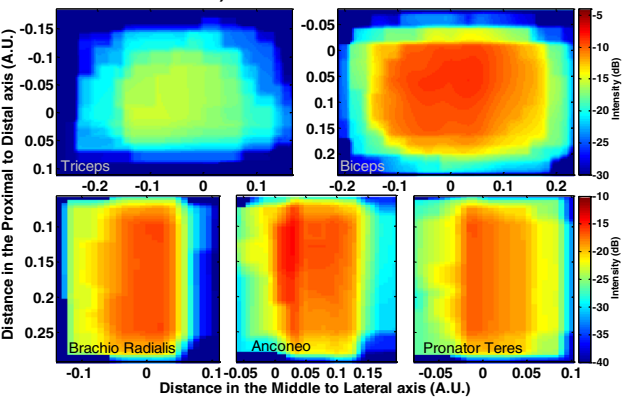

d) Pronation, 50% MVC

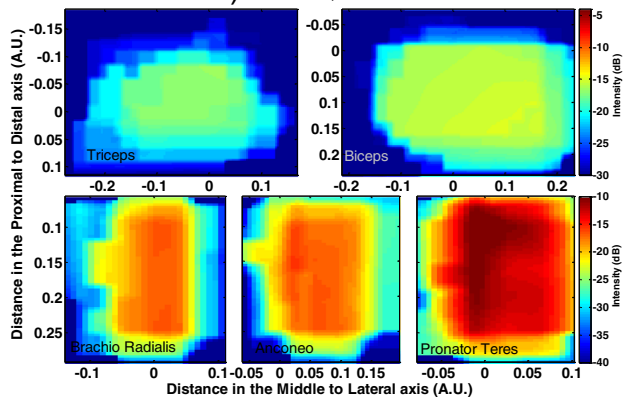

Supplement: MOESM8 [file 9605974]
